# Supplementary material for: Development of a SNP array and its application to genetic mapping and diversity assessment in pepper (Capsicum spp.)
Source: PubMed Central journal article supplement (PMC5020730; doi:10.1038/srep33293), 2016-09-13
Supplement: srep33293-s1.pdf [file srep33293-s1.pdf]

## Development of a SNP array and its application to genetic mapping and diversity assessment in pepper (*Capsicum* spp.)

Jiaowen Cheng<sup>1¶</sup>, Cheng Qin<sup>2, 3¶</sup>, Xin Tang<sup>1¶</sup>, Huangkai Zhou<sup>4</sup>, Yafei Hu<sup>5</sup>, Zicheng Zhao<sup>6</sup>, Junjie Cui<sup>1</sup>, Bo Li<sup>1</sup>, Zhiming Wu<sup>7</sup>, Jiping Yu<sup>2\*</sup>, Kailin Hu<sup>1\*</sup>

### Supporting Information Legends

**Supplementary Figure S1.** The frequency distribution of 8,199 scorable SNPs with various types and locations.

**A**, Type; **B**, location.

**Supplementary Figure S2.** Phenotypes and schematic diagrams of fruit orientation in pepper.

**A**, The erect phenotype, with a vertical upward pedicel and fruit tip; **B**, the lateral pendant phenotype, with a near-horizontally orientated pedicel and fruit tip; **C**, the vertical pendant phenotype, with a straight-down pedicel and fruit tip.

**Supplementary Table S1.** The information of 8,199 scorable SNP loci on the *Cap*SNP15K array of pepper.

**Supplementary Table S2.** Estimation of duplicate reproducibility based on 8,003 SNPs.

**Supplementary Table S3.** Estimation of P-P-C heritability based on 8,003 SNPs.

**Supplementary Table S4.** The genetic and physical positions of 5,672 SNPs used for genetic mapping.

**Supplementary Table S5.** List of 65 candidate genes located in 1-LOD drop CI for *up* locus of pepper.

**Supplementary Table S6.** The horticultural characterization, grouping and population structure of the 399 pepper elite/landrace lines.

**Supplementary Table S7.** Comprison of 398 *C. annuum* lines between clustering and structure analysis.

**Supplementary Table S8.** List of genes implicated in the regulation of pedicel orientation and their closest homologues in pepper.

### Supplementary Tables

**Supplementary Tables S1 is provided in the form of a single file.**

#### **Supplementary Table S2. Estimation of duplicate reproducibility based on 8,003 SNPs.**

| Sample | Repeat 1 | Repeat 2 | # Correct | # Error | Total <sup>a</sup> | Duplicate reproducibility(%) |
|--------|----------|----------|-----------|---------|--------------------|------------------------------|
| BA3    | BA3-1    | BA3-2    | 7,782     | 0       | 7,782              | 100.00                       |
| B702   | B702-1   | B702-2   | 7,929     | 0       | 7,929              | 100.00                       |

<sup>a</sup> The number of SNPs that presented in two repeats.

#### **Supplementary Table S3. Estimation of P-P-C heritability based on 8,003 SNPs.**

| Child-DNA | Parent 1 | Parent 2 | # Correct | # Error | Total <sup>a</sup> | P-P-C heritability (%) |
|-----------|----------|----------|-----------|---------|--------------------|------------------------|
| F1-BB-1   | BA3-1    | B702-1   | 4,980     | 204     | 5,184              | 96.06                  |
| F1-BB-2   | BA3-2    | B702-2   | 4,638     | 328     | 4,966              | 93.40                  |

<sup>a</sup> The number of SNPs that presented in three parental and F<sub>1</sub> samples.

**Supplementary Tables S4 is provided in the form of a single file.**

**Supplementary Table S5. List of 65 candidate genes located in 1-LOD drop CI for *up* locus of pepper.**

| Gene name              | Start position | End position | Gene symbol | Homologous species          | Homologous protein                    |
|------------------------|----------------|--------------|-------------|-----------------------------|---------------------------------------|
| <i>Capana12g000941</i> | 36,558,550     | 36,559,306   | PFK1        | <i>Arabidopsis thaliana</i> | 6-phosphofructokinase 1               |
| <i>Capana12g000942</i> | 36,617,084     | 36,617,572   | New gene    |                             |                                       |
| <i>Capana12g000943</i> | 36,655,866     | 36,659,865   | PUP3        | <i>Arabidopsis thaliana</i> | Purine permease 3                     |
| <i>Capana12g000944</i> | 36,678,874     | 36,679,269   | New gene    |                             |                                       |
| <i>Capana12g000945</i> | 36,962,779     | 36,964,097   | New gene    |                             |                                       |
| <i>Capana12g000946</i> | 36,964,963     | 36,966,866   | New gene    |                             |                                       |
| <i>Capana12g000948</i> | 37,018,517     | 37,030,992   | New gene    |                             |                                       |
| <i>Capana12g000949</i> | 37,036,408     | 37,037,557   | New gene    |                             |                                       |
| <i>Capana12g000950</i> | 37,317,274     | 37,317,706   | New gene    |                             |                                       |
| <i>Capana12g000951</i> | 37,319,249     | 37,320,811   | New gene    |                             |                                       |
| <i>Capana12g000952</i> | 37,376,725     | 37,380,297   | New gene    |                             |                                       |
| <i>Capana12g000954</i> | 37,459,071     | 37,460,454   | New gene    |                             |                                       |
| <i>Capana12g000955</i> | 37,628,063     | 37,628,443   | New gene    |                             |                                       |
| <i>Capana12g000958</i> | 37,644,791     | 37,650,731   | DRG2        | <i>Arabidopsis thaliana</i> | Developmentally regulated G-protein 2 |
| <i>Capana12g000959</i> | 37,683,574     | 37,688,329   | New gene    |                             |                                       |

|                        |            |            |           |                             |                                                 |
|------------------------|------------|------------|-----------|-----------------------------|-------------------------------------------------|
| <i>Capana12g000960</i> | 37,689,586 | 37,689,918 | EFL3      | <i>Arabidopsis thaliana</i> | Protein ELF4-LIKE 3                             |
| <i>Capana12g000962</i> | 37,733,635 | 37,734,657 | New gene  |                             |                                                 |
| <i>Capana12g000964</i> | 37,739,818 | 37,740,560 | New gene  |                             |                                                 |
| <i>Capana12g000965</i> | 37,783,070 | 37,785,471 | New gene  |                             |                                                 |
| <i>Capana12g000966</i> | 37,786,745 | 37,787,077 | EFL3      | <i>Arabidopsis thaliana</i> | Protein ELF4-LIKE 3                             |
| <i>Capana12g000967</i> | 37,891,276 | 37,893,142 | MYBC      | <i>Zea mays</i>             | Anthocyanin regulatory C1 protein               |
| <i>Capana12g000968</i> | 37,915,594 | 37,916,120 | New gene  |                             |                                                 |
| <i>Capana12g000969</i> | 37,928,500 | 37,931,398 | ATG12     | <i>Medicago truncatula</i>  | Ubiquitin-like protein ATG12                    |
| <i>Capana12g000970</i> | 37,933,621 | 37,934,247 | ABP19A    | <i>Prunus persica</i>       | Auxin-binding protein ABP19a                    |
| <i>Capana12g000971</i> | 38,186,615 | 38,187,046 | New gene  |                             |                                                 |
| <i>Capana12g000972</i> | 38,264,977 | 38,265,832 | At5g01020 | <i>Arabidopsis thaliana</i> | Serine/threonine-protein kinase At5g01020       |
| <i>Capana12g000973</i> | 38,358,798 | 38,359,109 | New gene  |                             |                                                 |
| <i>Capana12g000975</i> | 38,359,822 | 38,360,898 | NAD5      | <i>Triticum aestivum</i>    | NADH-ubiquinone oxidoreductase chain 5          |
| <i>Capana12g000976</i> | 38,430,680 | 38,433,697 | At1g72540 | <i>Arabidopsis thaliana</i> | Putative receptor-like protein kinase At1g72540 |
| <i>Capana12g000978</i> | 38,980,737 | 38,981,694 | New gene  |                             |                                                 |
| <i>Capana12g000979</i> | 39,002,580 | 39,003,837 | New gene  |                             |                                                 |
| <i>Capana12g000980</i> | 39,016,908 | 39,019,920 | New gene  |                             |                                                 |

|                        |            |            |          |                             |                                           |
|------------------------|------------|------------|----------|-----------------------------|-------------------------------------------|
| <i>Capana12g000981</i> | 39,019,948 | 39,021,887 | New gene |                             |                                           |
| <i>Capana12g000982</i> | 39,024,682 | 39,027,683 | New gene |                             |                                           |
| <i>Capana12g000983</i> | 39,045,217 | 39,049,182 | SEC22    | <i>Arabidopsis thaliana</i> | 25.3 kDa vesicle transport protein        |
| <i>Capana12g000984</i> | 39,049,950 | 39,051,757 | New gene |                             |                                           |
| <i>Capana12g000985</i> | 39,052,779 | 39,055,821 | New gene |                             |                                           |
| <i>Capana12g000986</i> | 39,056,366 | 39,056,899 | New gene |                             |                                           |
| <i>Capana12g000987</i> | 39,064,202 | 39,082,032 | Nup107   | <i>Mus musculus</i>         | Nuclear pore complex protein Nup107       |
| <i>Capana12g000990</i> | 39,269,034 | 39,274,278 | TIFY10B  | <i>Arabidopsis thaliana</i> | Protein TIFY 10B                          |
| <i>Capana12g000991</i> | 39,290,108 | 39,297,758 | Tmem87a  | <i>Xenopus tropicalis</i>   | Transmembrane protein 87A                 |
| <i>Capana12g000992</i> | 39,314,704 | 39,316,697 | CBSDUF7  | <i>Arabidopsis thaliana</i> | DUF21 domain-containing protein At1g47330 |
| <i>Capana12g000993</i> | 39,321,504 | 39,322,085 | New gene |                             |                                           |
| <i>Capana12g000994</i> | 39,465,598 | 39,467,865 | New gene |                             |                                           |
| <i>Capana12g000996</i> | 39,767,987 | 39,776,493 | Fig4     | <i>Mus musculus</i>         | Polyphosphoinositide phosphatase          |
| <i>Capana12g000999</i> | 39,881,247 | 39,889,683 | GLIP5    | <i>Arabidopsis thaliana</i> | GDSL esterase/lipase 5                    |
| <i>Capana12g001002</i> | 39,992,532 | 39,993,545 | New gene |                             |                                           |
| <i>Capana12g001003</i> | 39,995,458 | 39,996,613 | New gene |                             |                                           |
| <i>Capana12g001004</i> | 40,021,604 | 40,022,422 | New gene |                             |                                           |

|                        |            |            |           |                                 |                                                                  |
|------------------------|------------|------------|-----------|---------------------------------|------------------------------------------------------------------|
| <i>Capana12g001005</i> | 40,100,125 | 40,112,227 | New gene  |                                 |                                                                  |
| <i>Capana12g001007</i> | 40,472,266 | 40,473,107 | ATP5E     | <i>Ipomoea batatas</i>          | ATP synthase subunit 5                                           |
| <i>Capana12g001008</i> | 40,474,850 | 40,475,953 | New gene  |                                 |                                                                  |
| <i>Capana12g001009</i> | 40,611,845 | 40,613,824 | Exoc7     | <i>Rattus norvegicus</i>        | Exocyst complex component 7                                      |
| <i>Capana12g001010</i> | 40,615,725 | 40,618,088 | New gene  |                                 |                                                                  |
| <i>Capana12g001011</i> | 40,622,428 | 40,636,788 | At4g18375 | <i>Arabidopsis thaliana</i>     | KH domain-containing protein At4g18375                           |
| <i>Capana12g001012</i> | 40,869,247 | 40,883,486 | SWI3D     | <i>Arabidopsis thaliana</i>     | SWI/SNF complex subunit SWI3D                                    |
| <i>Capana12g001013</i> | 40,885,348 | 40,890,485 | RABG3F    | <i>Arabidopsis thaliana</i>     | Ras-related protein RABG3f                                       |
| <i>Capana12g001014</i> | 40,893,131 | 40,896,956 | PERK4     | <i>Arabidopsis thaliana</i>     | Proline-rich receptor-like protein kinase PERK4                  |
| <i>Capana12g001015</i> | 40,946,680 | 40,960,886 | At4g34450 | <i>Arabidopsis thaliana</i>     | Coatomer subunit 3                                               |
| <i>Capana12g001016</i> | 40,961,437 | 40,962,249 | New gene  |                                 |                                                                  |
| <i>Capana12g001017</i> | 40,963,010 | 40,971,221 | GBB2      | <i>Nicotiana tabacum</i>        | Guanine nucleotide-binding protein subunit beta-2                |
| <i>Capana12g001018</i> | 40,974,606 | 40,981,738 | At4g34480 | <i>Arabidopsis thaliana</i>     | Glucan endo-1,3-beta-glucosidase 7                               |
| <i>Capana12g001019</i> | 40,986,390 | 40,996,534 | cap       | <i>Dictyostelium discoideum</i> | Adenylyl cyclase-associated protein                              |
| <i>Capana12g001020</i> | 41,000,982 | 41,005,216 | At4g34500 | <i>Arabidopsis thaliana</i>     | Probable receptor-like serine/threonine-protein kinase At4g34500 |
| <i>Capana12g001021</i> | 41,033,062 | 41,033,647 | New gene  |                                 |                                                                  |

---

Supplementary Tables S6 is provided in the form of a single file.

Supplementary Table S7. Comprison of 398 *C. annuum* lines between clustering and structure analysis.

|       | I   | II  | II-1 | II-2 | II-3 | II-4 | II-5 | Other <sup>a</sup> | Total |
|-------|-----|-----|------|------|------|------|------|--------------------|-------|
| P1    | 89  | 10  | 2    | 4    | 0    | 0    | 4    | 0                  | 99    |
| P2    | 12  | 286 | 1    | 7    | 1    | 25   | 252  | 1                  | 299   |
| Total | 101 | 296 | 3    | 11   | 1    | 25   | 256  | 1                  | 398   |

<sup>a</sup>Refer to the line Y126.

Supplementary Table S8. List of genes implicated in the regulation of pedicel orientation and their homologues in pepper.

| Gene symbol              | Species     | Accession number                                        | Protein description               | Zunla-1 closest homologue                |
|--------------------------|-------------|---------------------------------------------------------|-----------------------------------|------------------------------------------|
| <i>LFY</i>               | Arabidopsis | NP_200993.1_1                                           | transcription factor              | <i>Capana03g000623</i>                   |
| <i>KNAT1/BP</i>          | Arabidopsis | NP_192555.1                                             | homeobox protein knotted-1-like 1 | <i>Capana04g000755</i>                   |
| <i>KNAT2</i>             | Arabidopsis | NP_177208.2                                             | homeobox protein knotted-1-like 2 | <i>Capana11g001260</i>                   |
| <i>KNAT6</i>             | Arabidopsis | NP_850951.2                                             | homeobox protein knotted-1-like 6 | <i>Capana11g001260</i>                   |
| <i>CRM1/BIG</i>          | Arabidopsis | NP_186875.2                                             | auxin transport protein           | <i>Capana02g003223</i>                   |
| <i>AS1</i>               | Arabidopsis | NP_181299.1                                             | transcription factor              | <i>Capana09g001823</i>                   |
| <i>AS2</i>               | Arabidopsis | NP_001077777.1                                          | transcription factor              | <i>Capana12g002602</i>                   |
| <i>ATH1</i>              | Arabidopsis | NP_195024.1                                             | homeobox protein ATH1             | <i>Capana08g000327</i>                   |
| <i>SLAGO7</i>            | Tomato      | NP_001266209.1                                          | protein argonaute 7               | <i>Capana01g002131</i>                   |
| <i>NtSVP<sup>a</sup></i> | Tobacco     | mRNA_128733_cds;<br>mRNA_131449_cds;<br>mRNA_171558_cds | MADS-box transcription factor     | <i>CaSVP/CaJOINTLESS/Capana12g002710</i> |

<sup>a</sup>Its accession numbers were from the SOL Genomics Network (<https://solgenomics.net/>).

## Supplementary Figures

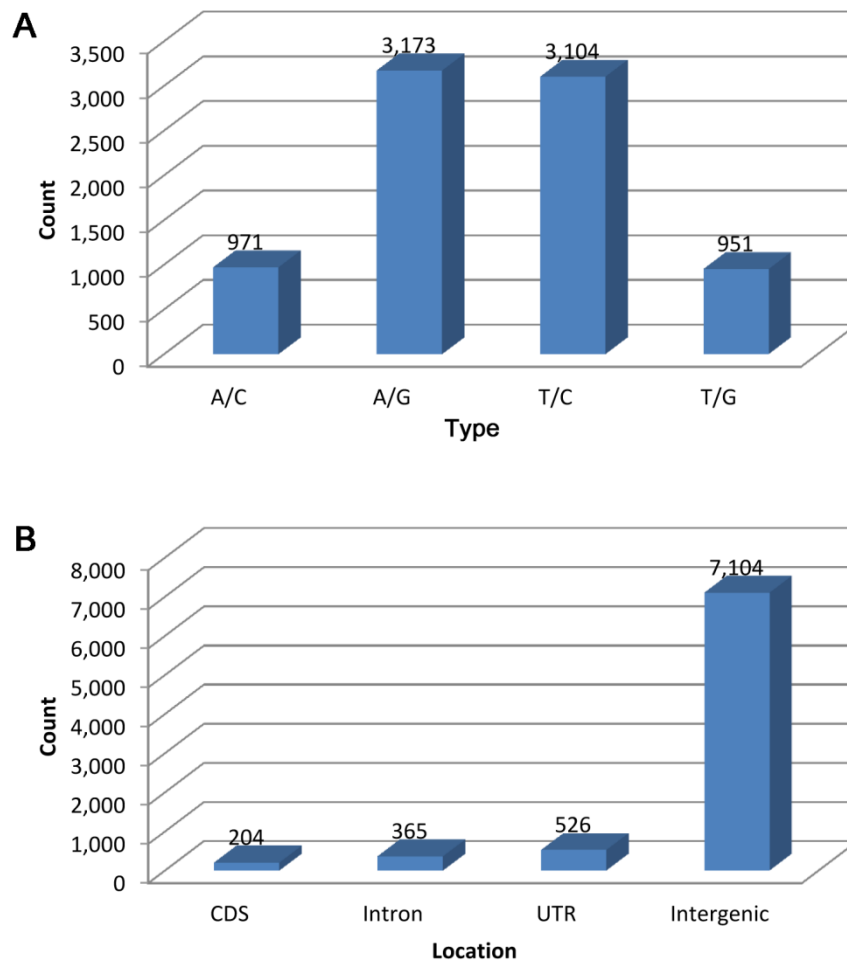

**Supplementary Figure S1.** The frequency distribution of 8,199 scorable SNPs with various types and locations.

**A**, Type; **B**, location.



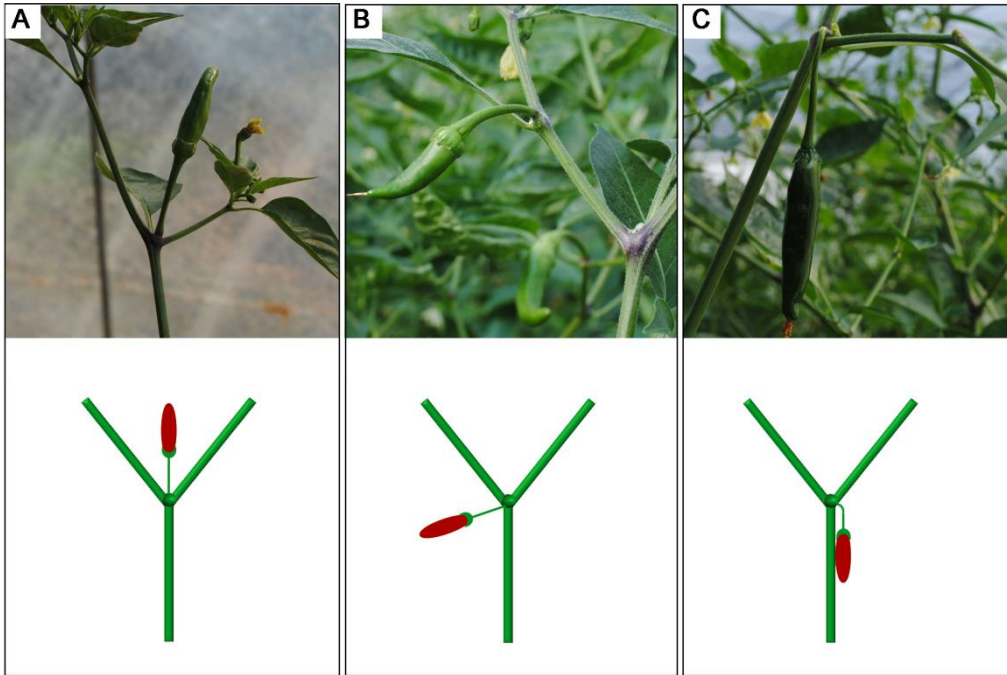

**Supplementary Figure S2.** Phenotypes and schematic diagrams of fruit orientation in pepper.

**A**, The erect phenotype, with a vertical upward pedicel and fruit tip; **B**, the lateral pendant phenotype, with a near-horizontally orientated pedicel and fruit tip; **C**, the vertical pendant phenotype, with a straight-down pedicel and fruit tip.
